# Supplementary material
Source: publisher site journal article supplement (https://www.dovepress.com/article/540050)
Supplement: Supplementary file 1 [file Supplementary%20Data.docx]

Supplementary Data

Figure S1. Summary of upregulated (A,B,C) and downregulated (D,E,F) proteins after treatment with ND, which were designated to particular GO categories: BP (A,D); CC (B,E); MF (C,F. The expanded presentation of analysis from Fig.7.

Figure S2. Summary of upregulated (A,B,C) and downregulated (D,E,F) proteins after treatment with NDM, which were designated to particular GO categories: BP (A,D); CC (B,E); MF (C,F. The expanded presentation of analysis from Fig.7.

Figure S3. Summary of upregulated (A,C) and downregulated (B,D) proteins after treatment with ND (A,B) and NDM (C,D), which were designated to particular pathways within REACTOME_PATHWAYS, WIKI_PATHWAYS and KEGG_PATHWAYS database in analysis using DAVID online tool. The expanded presentation of analysis from Fig.8.

Table S1. Altered proteins after ND and NDM treatment, which log2FC abundance ration in comparison to control was equal or above |1|. This data was used for GO enrichment analysis.

| NB | UNIPROT ACCESSION | GENE NAME | Log2FC Abundance Ratio | Abundance Ratio Adj. p-value (-log10p-value) |
| --- | --- | --- | --- | --- |
| **ND DOWNREGULATED** | | | | |
| 1 | Q8IVM0 | CCDC50 | -4.34 | 15.30 |
| 2 | P02774 | GC | -4.3 | 15.30 |
| 3 | P98179 | RBM3 | -4.14 | 15.30 |
| 4 | Q92804 | TAF15 | -2.5 | 15.30 |
| 5 | Q86VW0 | SESTD1 | -2.05 | 15.30 |
| 6 | P33552 | CKS2 | -2.01 | 6.06 |
| 7 | Q14011 | CIRBP | -1.95 | 11.26 |
| 8 | Q9UI15 | TAGLN3 | -1.93 | 15.30 |
| 9 | Q9P021 | CRIPT | -1.9 | 11.11 |
| 10 | Q66PJ3 | ARL6IP4 | -1.87 | 5.18 |
| 11 | Q8N9N8 | EIF1AD | -1.83 | 10.53 |
| 12 | P35637 | FUS | -1.79 | 4.65 |
| 13 | Q14689 | DIP2A | -1.74 | 11.88 |
| 14 | P38159 | RBMX | -1.74 | 3.92 |
| 15 | Q9BTL3 | RAMAC | -1.69 | 11.25 |
| 16 | A0A3B3IU46 | RAMACL | -1.69 | 3.70 |
| 17 | O15541 | RNF113A | -1.63 | 3.70 |
| 18 | Q8IZP6 | RNF113B | -1.63 | 4.34 |
| 19 | Q8WWN8 | ARAP3 | -1.54 | 4.34 |
| 20 | P22626 | HNRNPA2B1 | -1.53 | 2.99 |
| 21 | P26232 | CTNNA2 | -1.51 | 8.36 |
| 22 | P23588 | EIF4B | -1.5 | 6.88 |
| 23 | P61024 | CKS1B | -1.43 | 10.61 |
| 24 | Q9NQI0 | DDX4 | -1.43 | 6.36 |
| 25 | Q7Z6K5 | ARPIN | -1.4 | 8.09 |
| 26 | O00571 | DDX3X | -1.36 | 2.90 |
| 27 | Q8N9E0 | FAM133A | -1.36 | 6.34 |
| 28 | Q5BKY9 | FAM133B | -1.36 | 3.39 |
| 29 | O15523 | DDX3Y | -1.35 | 3.39 |
| 30 | Q15417 | CNN3 | -1.32 | 5.97 |
| 31 | Q9Y297 | BTRC | -1.28 | 6.10 |
| 32 | Q16527 | CSRP2 | -1.26 | 1.80 |
| 33 | P31483 | TIA1 | -1.24 | 4.04 |
| 34 | P31942 | HNRNPH3 | -1.21 | 3.58 |
| 35 | Q9BU76 | MMTAG2 | -1.21 | 5.07 |
| 36 | O75526 | RBMXL2 | -1.21 | 2.15 |
| 37 | Q96FF9 | CDCA5 | -1.2 | 5.89 |
| 38 | Q9UER7 | DAXX | -1.18 | 1.53 |
| 39 | P35237 | SERPINB6 | -1.18 | 1.89 |
| 40 | Q14247 | CTTN | -1.16 | 6.21 |
| 41 | Q9UNZ5 | C19orf53 | -1.14 | 4.22 |
| 42 | Q92620 | DHX38 | -1.14 | 3.45 |
| 43 | Q8WUH6 | TMEM263 | -1.13 | 3.20 |
| 44 | P26374 | CHML | -1.12 | 3.48 |
| 45 | Q8IXQ5 | KLHL7 | -1.12 | 1.14 |
| 46 | P83881 | RPL36A | -1.12 | 1.24 |
| 47 | Q969Q0 | RPL36AL | -1.12 | 5.37 |
| 48 | Q9NQ29 | LUC7L | -1.1 | 5.37 |
| 49 | Q96KB5 | PBK | -1.1 | 3.32 |
| 50 | Q9UHR5 | SAP30BP | -1.09 | 3.28 |
| 51 | P78332 | RBM6 | -1.04 | 3.26 |
| 52 | O43148 | RNMT | -1.03 | 2.15 |
| 53 | Q9NPD8 | UBE2T | -1.03 | 2.20 |
| 54 | Q15056 | EIF4H | -1.01 | 2.74 |
| 55 | O14965 | AURKA | -1 | 2.94 |
| 56 | Q9Y478 | PRKAB1 | -1 | 1.64 |
| 57 | O75157 | TSC22D2 | -1 | 0.83 |
| **ND UPREGULATED** | | | | |
| 1 | P12821 | ACE | 1 | 2.53 |
| 2 | P17936 | IGFBP3 | 1 | 1.57 |
| 3 | Q9Y3D3 | MRPS16 | 1 | 3.15 |
| 4 | Q96QD8 | SLC38A2 | 1.01 | 2.40 |
| 5 | Q01484 | ANK2 | 1.02 | 3.49 |
| 6 | Q76M96 | CCDC80 | 1.03 | 1.57 |
| 7 | Q12791 | KCNMA1 | 1.03 | 2.51 |
| 8 | O43567 | RNF13 | 1.03 | 1.40 |
| 9 | Q86VE9 | SERINC5 | 1.03 | 2.76 |
| 10 | Q16270 | IGFBP7 | 1.04 | 1.54 |
| 11 | P04233 | CD74 | 1.06 | 4.78 |
| 12 | Q13530 | SERINC3 | 1.06 | 2.46 |
| 13 | P02748 | C9 | 1.07 | 3.80 |
| 14 | P09603 | CSF1 | 1.07 | 1.61 |
| 15 | P10124 | SRGN | 1.07 | 3.16 |
| 16 | P16104 | H2AX | 1.08 | 3.24 |
| 17 | O14880 | MGST3 | 1.08 | 6.20 |
| 18 | Q92562 | FIG4 | 1.11 | 3.66 |
| 19 | P53801 | PTTG1IP | 1.11 | 2.15 |
| 20 | P69905 | HBA1; HBA2 | 1.12 | 4.04 |
| 21 | P04004 | VTN | 1.13 | 5.40 |
| 22 | P35442 | THBS2 | 1.14 | 3.57 |
| 23 | Q14956 | GPNMB | 1.16 | 5.26 |
| 24 | P35625 | TIMP3 | 1.17 | 6.84 |
| 25 | P68871 | HBB | 1.21 | 6.77 |
| 26 | P02042 | HBD | 1.21 | 5.26 |
| 27 | O00622 | CCN1 | 1.22 | 5.26 |
| 28 | Q9ULI3 | HEG1 | 1.22 | 2.42 |
| 29 | Q8TCT8 | SPPL2A | 1.22 | 2.74 |
| 30 | A6NMX2 | EIF4E1B | 1.24 | 3.99 |
| 31 | Q5JS37 | NHLRC3 | 1.24 | 3.71 |
| 32 | P07996 | THBS1 | 1.24 | 2.79 |
| 33 | O14817 | TSPAN4 | 1.24 | 7.14 |
| 34 | P02794 | FTH1 | 1.25 | 5.36 |
| 35 | Q6UXH9 | PAMR1 | 1.3 | 7.75 |
| 36 | P07093 | SERPINE2 | 1.3 | 5.65 |
| 37 | P19823 | ITIH2 | 1.31 | 9.97 |
| 38 | Q8NC54 | KCT2 | 1.32 | 2.81 |
| 30 | Q08431 | MFGE8 | 1.34 | 4.24 |
| 40 | Q86TS9 | MRPL52 | 1.34 | 8.02 |
| 41 | P15289 | ARSA | 1.35 | 4.99 |
| 42 | Q8IY21 | DDX60 | 1.35 | 6.81 |
| 43 | Q8WYL5 | SSH1 | 1.35 | 2.74 |
| 44 | O43854 | EDIL3 | 1.4 | 3.27 |
| 45 | P24593 | IGFBP5 | 1.44 | 5.71 |
| 46 | P02765 | AHSG | 1.45 | 11.26 |
| 47 | O00560 | SDCBP | 1.46 | 9.15 |
| 48 | P02792 | FTL | 1.48 | 10.56 |
| 49 | P24390 | KDELR1 | 1.49 | 11.32 |
| 50 | P08962 | CD63 | 1.5 | 7.08 |
| 51 | P58511 | SMIM11 | 1.52 | 5.34 |
| 52 | O00300 | TNFRSF11B | 1.58 | 3.85 |
| 53 | Q92574 | TSC1 | 1.61 | 15.30 |
| 54 | Q8N2C7 | UNC80 | 1.63 | 4.78 |
| 55 | P42226 | STAT6 | 1.69 | 8.89 |
| 56 | P35555 | FBN1 | 1.7 | 9.94 |
| 57 | O14966 | RAB29 | 1.72 | 11.37 |
| 58 | P42772 | CDKN2B | 1.73 | 4.84 |
| 59 | Q8N3P4 | VPS8 | 1.88 | 10.51 |
| 60 | P05129 | PRKCG | 1.91 | 5.96 |
| 61 | O75177 | SS18L1 | 1.94 | 10.12 |
| 62 | O75629 | CREG1 | 1.97 | 7.71 |
| 63 | Q9UBG7 | RBPJL | 2.04 | 13.96 |
| 64 | Q99988 | GDF15 | 2.14 | 11.00 |
| 65 | P21741 | MDK | 2.16 | 13.96 |
| 66 | Q15582 | TGFBI | 2.49 | 15.30 |
| 67 | B7ZAP0 | RABGAP1L | 2.63 | 15.30 |
| 68 | Q5VVH2 | FKBP1C | 2.95 | 15.30 |
| 69 | P68431 | H3C1 | 3.36 | 15.30 |
| 70 | P02768 | ALB | 3.83 | 15.30 |
| 71 | Q71DI3 | H3C13 | 4.44 | 15.30 |
| **NDM DOWNREGULATED** | | | | |
| 1 | P98179 | RBM3 | -4.34 | 15.29 |
| 2 | P02774 | GC | -4.07 | 15.29 |
| 3 | Q9UI15 | TAGLN3 | -3.89 | 15.29 |
| 4 | Q92804 | TAF15 | -2.91 | 15.29 |
| 5 | P33552 | CKS2 | -2.71 | 13.95 |
| 6 | Q8IVM0 | CCDC50 | -2.58 | 12.04 |
| 7 | Q14011 | CIRBP | -2.49 | 15.29 |
| 8 | Q9BTL3 | RAMAC | -2.33 | 5.95 |
| 9 | A0A3B3IU46 | RAMACL | -2.33 | 5.95 |
| 10 | Q13015 | MLLT11 | -2.04 | 4.50 |
| 11 | Q8N9E0 | FAM133A | -1.87 | 5.34 |
| 12 | Q5BKY9 | FAM133B | -1.87 | 5.34 |
| 13 | P31942 | HNRNPH3 | -1.87 | 10.35 |
| 14 | O15541 | RNF113A | -1.79 | 3.79 |
| 15 | Q8IZP6 | RNF113B | -1.79 | 3.79 |
| 16 | P35637 | FUS | -1.69 | 8.75 |
| 17 | P26232 | CTNNA2 | -1.68 | 6.71 |
| 18 | Q15417 | CNN3 | -1.65 | 8.25 |
| 19 | P22626 | HNRNPA2B1 | -1.65 | 8.27 |
| 20 | Q66PJ3 | ARL6IP4 | -1.6 | 6.02 |
| 21 | Q8TF01 | PNISR | -1.58 | 2.67 |
| 22 | P35237 | SERPINB6 | -1.58 | 8.68 |
| 23 | O00571 | DDX3X | -1.52 | 6.76 |
| 24 | Q9NQI0 | DDX4 | -1.52 | 6.71 |
| 25 | Q9BQ04 | RBM4B | -1.52 | 3.07 |
| 26 | P62891 | RPL39 | -1.5 | 2.16 |
| 27 | Q59GN2 | RPL39P5 | -1.5 | 2.16 |
| 28 | P61024 | CKS1B | -1.48 | 4.65 |
| 29 | O15523 | DDX3Y | -1.48 | 6.38 |
| 30 | Q7Z6K5 | ARPIN | -1.44 | 2.18 |
| 31 | Q9P021 | CRIPT | -1.42 | 2.11 |
| 32 | P29375 | Mttl5A | -1.41 | 1.82 |
| 33 | O43665 | RGS10 | -1.38 | 1.81 |
| 34 | O43148 | RNMT | -1.38 | 2.89 |
| 35 | O75157 | TSC22D2 | -1.37 | 3.12 |
| 36 | P38159 | RBMX | -1.35 | 5.12 |
| 37 | Q01085 | TIAL1 | -1.35 | 6.20 |
| 38 | P31483 | TIA1 | -1.33 | 2.68 |
| 39 | Q9NQ29 | LUC7L | -1.31 | 3.17 |
| 40 | Q9UNZ5 | C19orf53 | -1.3 | 3.32 |
| 41 | P26374 | CHML | -1.3 | 1.60 |
| 42 | Q9UER7 | DAXX | -1.28 | 1.83 |
| 43 | Q8WUH6 | TMEM263 | -1.28 | 3.28 |
| 44 | Q92901 | RPL3L | -1.26 | 4.09 |
| 45 | P23588 | EIF4B | -1.25 | 5.16 |
| 46 | Q5T200 | ZC3H13 | -1.25 | 1.67 |
| 47 | O43768 | ENSA | -1.21 | 2.88 |
| 48 | O14979 | HNRNPDL | -1.21 | 3.91 |
| 49 | Q96L21 | RPL10L | -1.21 | 4.50 |
| 50 | Q14247 | CTTN | -1.18 | 3.63 |
| 51 | Q8N9N8 | EIF1AD | -1.17 | 0.95 |
| 52 | P63173 | RPL38 | -1.16 | 3.32 |
| 53 | Q9H788 | SH2D4A | -1.15 | 1.09 |
| 54 | Q9HCN4 | GPN1 | -1.14 | 1.53 |
| 55 | Q9BU76 | MMTAG2 | -1.14 | 1.28 |
| 56 | Q96BK5 | PINX1 | -1.14 | 0.96 |
| 57 | P78332 | RBM6 | -1.14 | 1.87 |
| 58 | Q8NCD3 | HJURP | -1.12 | 1.05 |
| 59 | P83881 | RPL36A | -1.12 | 3.19 |
| 60 | Q969Q0 | RPL36AL | -1.12 | 3.19 |
| 61 | Q9C0B5 | ZDHHC5 | -1.1 | 0.83 |
| 62 | P04792 | HSPB1 | -1.09 | 3.00 |
| 63 | O60828 | PQBP1 | -1.07 | 2.19 |
| 64 | Q8TAD8 | SNIP1 | -1.07 | 1.32 |
| 65 | Q96KB5 | PBK | -1.06 | 2.11 |
| 66 | Q5BJD5 | TMEM41B | -1.06 | 2.17 |
| 67 | Q92620 | DHX38 | -1.05 | 2.25 |
| 68 | Q9UHR5 | SAP30BP | -1.05 | 1.99 |
| 69 | O60927 | PPP1R11 | -1.04 | 1.37 |
| 70 | Q96A57 | TMEM230 | -1.03 | 1.96 |
| 71 | P08069 | IGF1R | -1.02 | 0.68 |
| 72 | Q8N5F7 | NKAP | -1.02 | 0.61 |
| 73 | Q5M9Q1 | NKAPL | -1.02 | 0.61 |
| 74 | Q13371 | PDCL | -1.02 | 0.70 |
| 75 | Q8N6T3 | ARFGAP1 | -1.01 | 1.87 |
| 76 | Q9Y383 | LUC7L2 | -1.01 | 2.41 |
| **NDM UPREGULATED** | | | | |
| 1 | P13473 | LAMP2 | 1 | 3.32 |
| 2 | Q8IWU2 | LMTK2 | 1 | 1.44 |
| 3 | Q8TCT8 | SPPL2A | 1.01 | 1.56 |
| 4 | Q969E8 | TSR2 | 1.01 | 1.22 |
| 5 | Q9NRX5 | SERINC1 | 1.02 | 1.92 |
| 6 | Q7Z4G1 | COMMD6 | 1.03 | 1.66 |
| 7 | Q9H920 | RNF121 | 1.03 | 1.16 |
| 8 | Q96QD8 | SLC38A2 | 1.03 | 2.34 |
| 9 | P68871 | HBB | 1.04 | 2.25 |
| 10 | P02042 | HBD | 1.04 | 2.25 |
| 11 | Q92562 | FIG4 | 1.05 | 1.16 |
| 12 | Q16270 | IGFBP7 | 1.05 | 2.92 |
| 13 | Q86TS9 | MRPL52 | 1.05 | 1.71 |
| 14 | O95084 | PRSS23 | 1.06 | 2.47 |
| 15 | P41732 | TSPAN7 | 1.06 | 1.84 |
| 16 | Q15818 | NPTX1 | 1.08 | 2.56 |
| 17 | Q9NWS8 | RMND1 | 1.1 | 1.27 |
| 18 | P22692 | IGFBP4 | 1.12 | 2.82 |
| 19 | P08962 | CD63 | 1.13 | 4.34 |
| 20 | P35625 | TIMP3 | 1.13 | 4.45 |
| 21 | P69905 | HBA1; HBA2 | 1.14 | 4.12 |
| 22 | Q9BYZ2 | LDHAL6B | 1.14 | 2.27 |
| 23 | Q6UXH9 | PAMR1 | 1.15 | 2.27 |
| 24 | Q15113 | PCOLCE | 1.15 | 2.31 |
| 25 | Q8WVN6 | SECTM1 | 1.15 | 1.72 |
| 26 | P16035 | TIMP2 | 1.15 | 3.03 |
| 27 | Q9BV23 | ABHD6 | 1.17 | 2.11 |
| 28 | Q9UBP4 | DKK3 | 1.17 | 3.24 |
| 29 | P02794 | FTH1 | 1.19 | 4.68 |
| 30 | Q14956 | GPNMB | 1.19 | 4.96 |
| 31 | Q8N1S5 | SLC39A11 | 1.19 | 1.56 |
| 32 | O00391 | QSOX1 | 1.2 | 2.22 |
| 33 | Q86VE9 | SERINC5 | 1.21 | 1.62 |
| 34 | Q9Y6N6 | LAMC3 | 1.22 | 2.16 |
| 35 | O43861 | ATP9B | 1.23 | 2.27 |
| 36 | Q9ULI3 | HEG1 | 1.23 | 1.67 |
| 37 | Q5VVH2 | FKBP1C | 1.26 | 2.74 |
| 38 | P31431 | SDC4 | 1.26 | 2.74 |
| 39 | Q16626 | MEA1 | 1.27 | 2.73 |
| 40 | Q6U841 | SLC4A10 | 1.27 | 2.78 |
| 41 | Q92626 | PXDN | 1.3 | 6.08 |
| 42 | Q92574 | TSC1 | 1.3 | 2.01 |
| 43 | C9JQL5 | DSPA2d | 1.31 | 2.97 |
| 44 | P02751 | FN1 | 1.31 | 6.20 |
| 45 | P17936 | IGFBP3 | 1.31 | 3.13 |
| 46 | P02792 | FTL | 1.32 | 6.26 |
| 47 | P04233 | CD74 | 1.33 | 2.62 |
| 48 | Q13530 | SERINC3 | 1.34 | 4.37 |
| 49 | O00468 | AGRN | 1.35 | 6.49 |
| 50 | A6NMX2 | EIF4E1B | 1.35 | 2.60 |
| 51 | P58511 | SMIM11 | 1.36 | 2.51 |
| 52 | Q8WYL5 | SSH1 | 1.36 | 2.35 |
| 53 | Q76M96 | CCDC80 | 1.39 | 3.31 |
| 54 | O43854 | EDIL3 | 1.41 | 3.49 |
| 55 | P13645 | KRT10 | 1.41 | 4.84 |
| 56 | P02748 | C9 | 1.43 | 2.43 |
| 57 | P15289 | ARSA | 1.45 | 4.11 |
| 58 | P10124 | SRGN | 1.46 | 3.81 |
| 59 | P07093 | SERPINE2 | 1.47 | 8.21 |
| 60 | P42772 | CDKN2B | 1.51 | 4.19 |
| 61 | O14966 | RAB29 | 1.56 | 2.89 |
| 62 | Q96B49 | TOMM6 | 1.57 | 4.92 |
| 63 | Q86SJ2 | AMIGO2 | 1.59 | 4.40 |
| 64 | Q08431 | MFGE8 | 1.61 | 9.31 |
| 65 | P42226 | STAT6 | 1.63 | 5.10 |
| 66 | P09603 | CSF1 | 1.64 | 5.14 |
| 67 | P19823 | ITIH2 | 1.65 | 4.02 |
| 68 | P29279 | CCN2 | 1.66 | 8.01 |
| 69 | P00749 | PLAU | 1.7 | 4.57 |
| 70 | P07996 | THBS1 | 1.7 | 10.76 |
| 71 | P35442 | THBS2 | 1.72 | 7.50 |
| 72 | P24390 | KDELR1 | 1.79 | 6.62 |
| 73 | P05129 | PRKCG | 1.8 | 5.34 |
| 74 | O00560 | SDCBP | 1.81 | 11.24 |
| 75 | O00622 | CCN1 | 1.83 | 4.36 |
| 76 | O75629 | CREG1 | 1.86 | 8.76 |
| 77 | P02765 | AHSG | 1.88 | 13.48 |
| 78 | P24593 | IGFBP5 | 1.92 | 13.95 |
| 79 | Q8N3P4 | VPS8 | 1.94 | 5.16 |
| 80 | O14519 | CDK2AP1 | 2.04 | 6.44 |
| 81 | O75956 | CDK2AP2 | 2.04 | 6.44 |
| 82 | Q5JS37 | NHLRC3 | 2.06 | 5.89 |
| 83 | O00300 | TNFRSF11B | 2.06 | 15.29 |
| 84 | Q8N2C7 | UNC80 | 2.1 | 10.75 |
| 85 | P35555 | FBN1 | 2.13 | 15.29 |
| 86 | P21741 | MDK | 2.22 | 15.29 |
| 87 | Q9UBG7 | RBPJL | 2.26 | 9.06 |
| 88 | Q99988 | GDF15 | 2.63 | 15.29 |
| 89 | Q15582 | TGFBI | 3.11 | 15.29 |
| 90 | O75177 | SS18L1 | 3.36 | 15.29 |
| 91 | Q71DI3 | H3C13 | 3.87 | 15.29 |
| 92 | P02768 | ALB | 4.12 | 15.29 |

Table S2. Respresentative GO categories from clustered enrichment analysis of altered proteins in DAVID online software. Cluster and terms selection was based on p-value (p-value<0,01 in BP, CC and MF categories; p-value<0,05 in pathways analysis) and FDR value (FDR<0,05 in BP, CC and MF categories selection); ES – enrichment score ; FDR – false discovery rate.

| **Term** | **Count** | | **Term p-value** | | **Category** | **Regulation vs control** | | | | **Cluster ES** | | **Term FDR** | |
| --- | --- | --- | --- | --- | --- | --- | --- | --- | --- | --- | --- | --- | --- |
| **ND** | | | | | | | | | | | | | |
| Positive regulation of response to stimulus | 23 | | 2.10E-05 | | BP | UP | | | | 4.14 | | 8.80E-03 | |
| Cell migration | 14 | | 9.20E-05 | | BP | UP | | | | 3.54 | | 1.70E-02 | |
| Cellular response to growth factors stimulus | 9 | | 2.30E-05 | | BP | UP | | | | 3.6 | | 8.80E-03 | |
| Regulation of cell adhesion | 12 | | 3.2E-4 | | BP | UP | | | | 3.39 | | 3.60E-02 | |
| Extracellular matrix | 17 | | 2.40E-13 | | CC | UP | | | | 11.97 | | 3.10E-11 | |
| Lysosome | 14 | | 1.70E-04 | | CC | UP | | | | 3.78 | | 4.50E-03 | |
| Extracellular membrane-bounded organelles | 25 | | 1.20E-03 | | CC | UP | | | | 3.41 | | 2.30E-02 | |
| Secretory granule lumen | 8 | | 3.40E-03 | | CC | UP | | | | 2.45 | | 4.90E-02 | |
| Glycosaminoglycan binding | 11 | | 9.10E-11 | | MF | UP | | | | 8.37 | | 3.40E-08 | |
| Signaling receptor regulator activity | 8 | | 6.60E-06 | | MF | UP | | | | 5.4 | | 2.70E-04 | |
| RNA splicing | 14 | | 1.30E-06 | | BP | DOWN | | | | 4.53 | | 1.20E-03 | |
| RNA processing | 19 | | 4.20E-06 | | BP | DOWN | | | | 3.67 | | 1.90E-03 | |
| Spliceosomal complex | 11 | | 1.40E-06 | | CC | DOWN | | | | 4.78 | | 2.70E-04 | |
| mRNA capping enzyme complex | 3 | | 2,0E-4 | | CC | DOWN | | | | - | | 1,4E-2 | |
| Ribonucleoprotein complex | 15 | | 2.20E-04 | | CC | DOWN | | | | 4.78 | | 1.40E-02 | |
| mRNA binding | 11 | | 9,3E-5 | | MF | DOWN | | | | - | | 2,4E-2 | |
| RNA binding | 24 | | 2,9E-4 | | MF | DOWN | | | | - | | 3,7E-2 | |
| **ND - PATHWAYS** | | | | | | | | | | | | | |
| Senescence-Associated Secretory Phenotype (SASP) | 5 | | 5.20E-03 | | REACTOME | UP | | | | 1.92 | | 2.50E-01 | |
| Focal adhesion PI3K Akt mTOR signaling | 6 | | 1.00E-02 | | WIKI | UP | | | | 1.89 | | 3.80E-01 | |
| Response to elevated platelet cytosolic Ca2+ | 5 | | 0.0047 | | REACTOME | UP | | | | 1.78 | | 0.25 | |
| mRNA processing | 5 | | 1,6E-2 | | WIKI | DOWN | | | | 1.86 | | 9,7E-1 | |
| mRNA Splicing | 5 | | 1.40E-02 | | REACTOME | DOWN | | | | 1.86 | | 9.50E-01 | |
| L13a-mediated translational silencing of Ceruloplasmin expression | 4 | | 2.80E-02 | | REACTOME | DOWN | | | | 1.53 | | 9.70E-01 | |
| GTP hydrolysis and joining of the 60S ribosomal subunit | 4 | | 2.70E-02 | | REACTOME | DOWN | | | | 1.53 | | 9.70E-01 | |
| Eukaryotic Translation Initiation | 4 | | 2.70E-02 | | REACTOME | DOWN | | | | 1.53 | | 9.70E-01 | |
| Cap-dependent Translation Initiation | 4 | | 3.20E-02 | REACTOME | | | DOWN | | 1.53 | | 9.70E-01 | |
| Regulation of T53 activity | 4 | | 3.20E-02 | RECTOME | | | DOWN | | -- | | 9.70E-01 | |
| **NDM** | | | | | | | | | | | | | |
| Regulation of cell adhesion | | 14 | 2.90E-04 | | BP | | | UP | | 3.67 | | 3.10E-02 | |
| Cellular response to growth factors stimulus | | 9 | 1.70E-04 | | BP | | | UP | | 3.6 | | 2.60E-02 | |
| Regulation of cell migration | | 16 | 1.30E-04 | | BP | | | UP | | 3.32 | | 2.60E-02 | |
| Tube morphogenesis | | 12 | 2.10E-04 | | BP | | | UP | | 2.84 | | 2.60E-02 | |
| Extracellular matrix | | 23 | 4.80E-19 | | CC | | | UP | | 17.68 | | 6.20E-17 | |
| Secretory vesicle lumen | | 11 | 1.60E-04 | | CC | | | UP | | 3.79 | | 3.10E-03 | |
| Lysosome | | 15 | 5.00E-04 | | CC | | | UP | | 3.3 | | 6.70E-03 | |
| Extracellular membrane-bounded organelle | | 32 | 4.80E-04 | | CC | | | UP | | 3.24 | | 6.70E-03 | |
| Glycosaminoglycan binding | | 14 | 5.00E-14 | | MF | | | UP | | 10.97 | | 1.90E-11 | |
| Signaling receptor regulator activity | | 12 | 9.00E-10 | | MF | | | UP | | 6.4 | | 8.70E-08 | |
| Peptidase regulator activity | | 8 | 4.20E-04 | | MF | | | UP | | 2.88 | | 1.00E-02 | |
| RNA splicing | | 18 | 3.1E-08 | | BP | | | DOWN | | 5.63 | | 3.70E-05 | |
| RNA processing | | 24 | 3.5E-07 | | BP | | | DOWN | | 5.63 | | 2.10E-04 | |
| Ribosome | | 9 | 3.1E-03 | | CC | | | DOWN | | 3.5 | | 2.30E-02 | |
| RNA binding | | 36 | 1.2E-07 | | MF | | | DOWN | | 5.67 | | 3.60E-05 | |
| **NDM - PATHWAYS** | | | | | | | | | | | | | |
| Regulation of Insulin-like Growth Factor (IGF) transport and uptake by Insulin-like Growth Factor Binding Proteins (IGFBPs) | | 12 | 8.90E-11 | | REACTOME | | | UP | | 7.24 | | 1.50E-08 | |
| Post-translational protein modification | | 18 | 3.80E-02 | | REACTOME | | | UP | | 7.24 | | 8.80E-01 | |
| Response to elevated platelet cytosolic Ca2+ | | 8 | 2.50E-05 | | REACTOME | | | UP | | 3.97 | | 2.70E-03 | |
| ECM-receptor interaction | | 6 | 1.10E-04 | | KEGG | | | UP | | 2.46 | | 1.50E-02 | |
| Focal adhesion PI3K Akt mTOR signaling | | 7 | 7.00E-03 | | WIKI | | | UP | | 2.11 | | 4.60E-01 | |
| mRNA Splicing | | 8 | 1.1E-03 | | RECTOME | | | DOWN | | 2.73 | | 1.30E-02 | |
| L13a-mediated translational silencing of Ceruloplasmin expression | | 7 | 2.6E-04 | | RECTOME | | | DOWN | | 2.58 | | 1.30E-02 | |
| GTP hydrolysis and joining of the 60S ribosomal subunit | | 7 | 2.8E-04 | | RECTOME | | | DOWN | | 2.58 | | 1.30E-02 | |
| Eukaryotic Translation Initiation | | 7 | 3.9E-04 | | RECTOME | | | DOWN | | 2.58 | | 1.30E-02 | |
| Cap-dependent Translation Initiation | | 7 | 3.9E-04 | | RECTOME | DOWN | | | | 2.58 | | 1.30E-02 | |


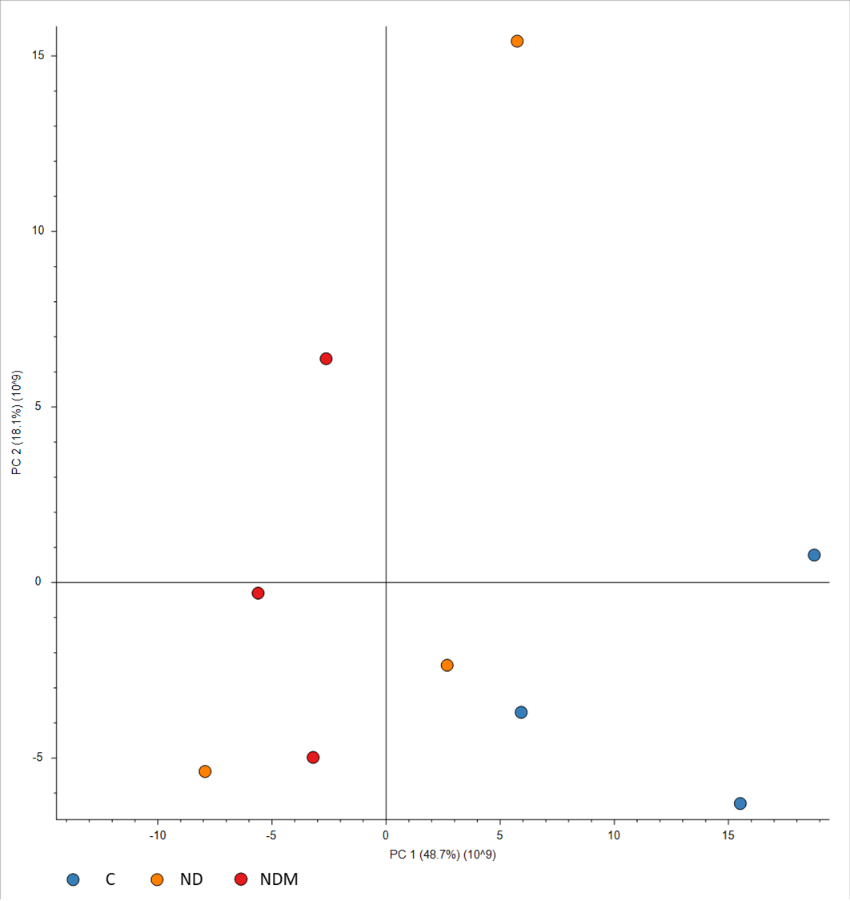


Figure S4. PCA analysis of proteomics results for T98G cells. The first principal component (PC1) explains 48.7% of the total variance, while the second (PC2) accounts for 18.1%. Together, these components capture 66.8% of the variability, allowing a clear visualization of the data structure in two dimensions. The axis values correspond to the scale of the original data (on the order of 10⁹) resulting from the PCA transformation; C – control, ND – diamond nanoparticles, NDM – modified diamond nanoparticles.
